# Supplementary material for: Investigation of Au/Co3O4nanocomposites in glycol oxidation by tailoring Co3O4morphology
Source: Royal Society of Chemistry journal article supplement (doi:10.1039/d1na00053e), 2021-01-01
Supplement: d1na00053e1.pdf [file d1na00053e1.pdf]

Electronic Supplementary Material (ESI) for Nanoscale Advances. This journal is © The Royal Society of Chemistry 2020

## Supporting Information

### Investigation of Au/Co<sub>3</sub>O<sub>4</sub> Nanocomposites by Tailoring Co<sub>3</sub>O<sub>4</sub> Morphology

Xuejiaowei, Sami Barkaoui, Jingwen Chen, Qihua Fang, Guiping Cao, Zeying Wu, Fei Wang\* and Gao Li\*

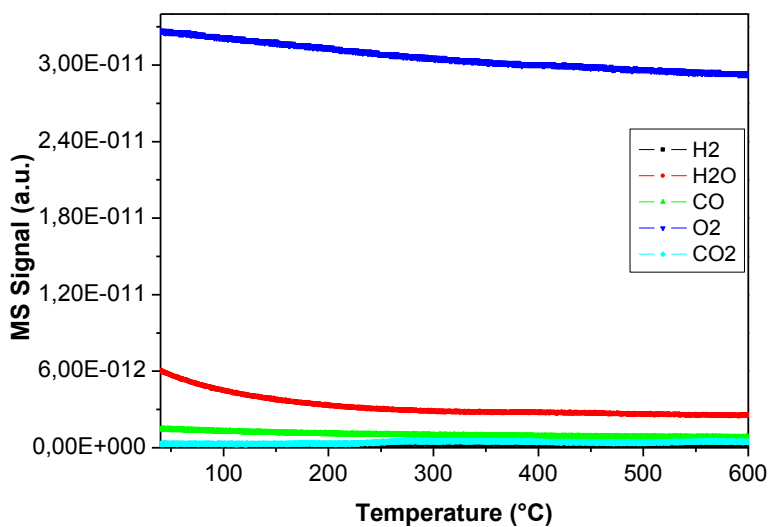

*Figure S1. TPO analysis of Co<sub>3</sub>O<sub>4</sub>-C oxides after 350 °C calcination.*

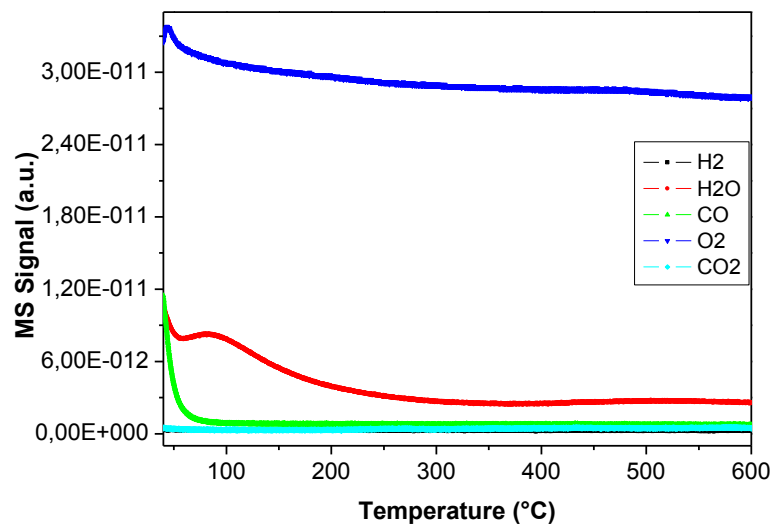

*Figure S2. TPO analysis of  $\text{Co}_3\text{O}_4\text{-P}$  oxides after 350 °C calcination.*

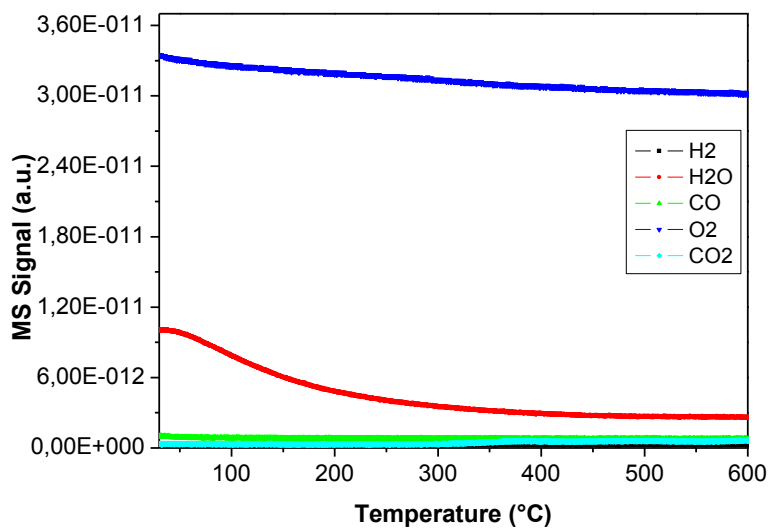

*Figure S3. TPO analysis of  $\text{Au}/\text{Co}_3\text{O}_4\text{-C}$  catalysts after 300 °C calcination.*

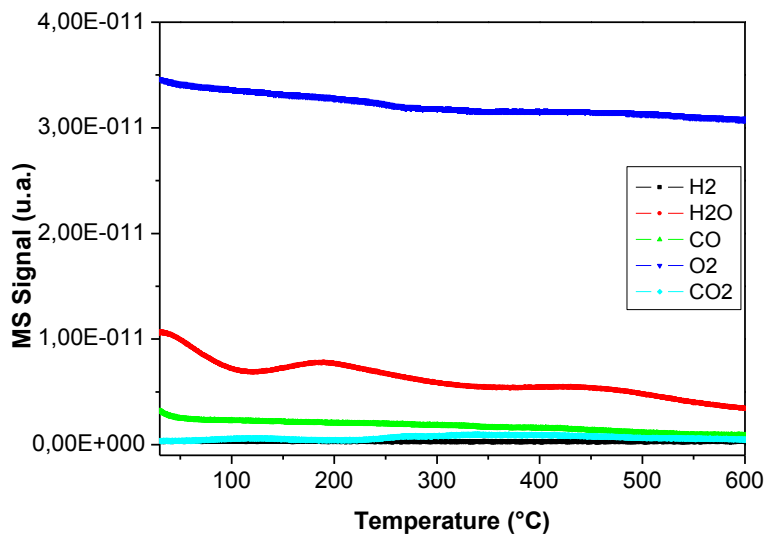

**Figure S4.** TPO analysis of Au/Co<sub>3</sub>O<sub>4</sub>-P catalysts after 300 °C calcination. Only some adsorbed water species on the Co<sub>3</sub>O<sub>4</sub>-P surface are observed at ~450 °C.

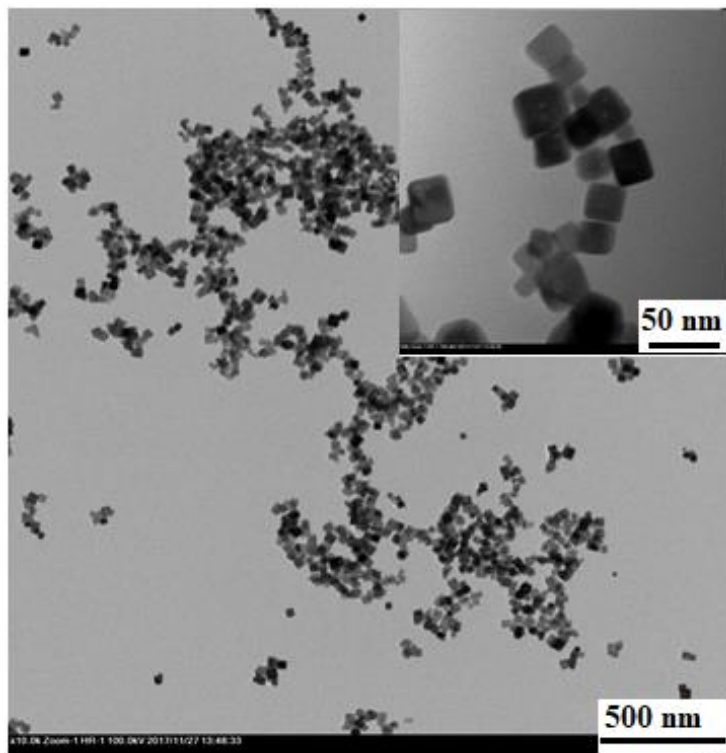

**Figure S5.** TEM images of as-prepared Co<sub>3</sub>O<sub>4</sub>-C oxide.

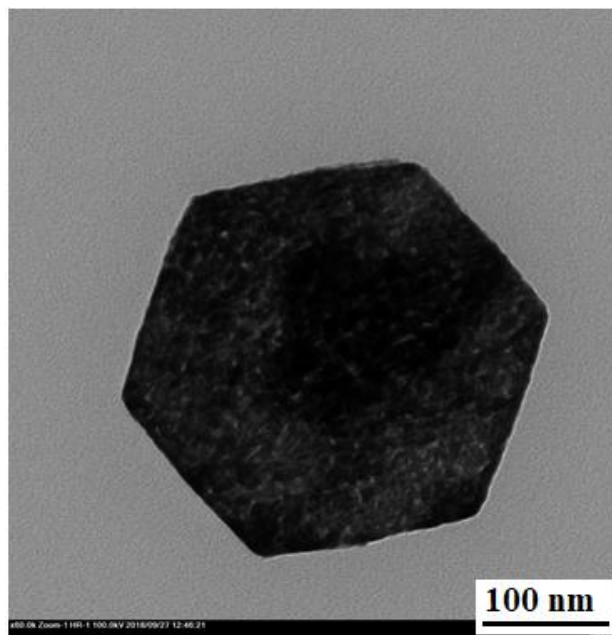

**Figure S6.** TEM images of as-prepared  $\text{Co}_3\text{O}_4\text{-P}$  oxide.

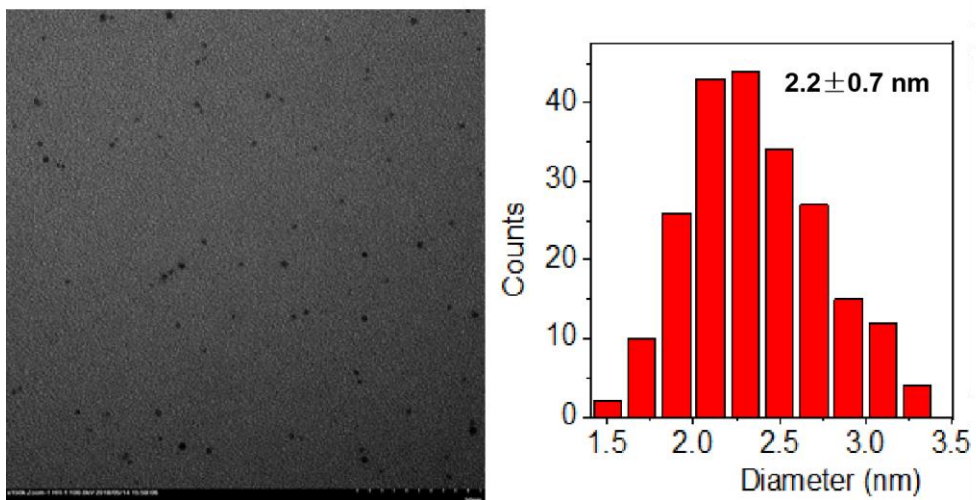

**Figure S7.** TEM images and size distribution of as-prepared Au colloids.

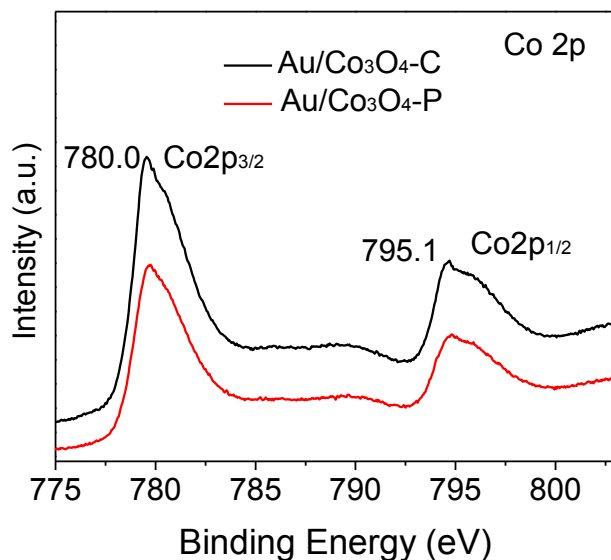

**Figure S8.** Co 2p XPS spectra of Au/Co<sub>3</sub>O<sub>4</sub>-C and Au/Co<sub>3</sub>O<sub>4</sub>-P.

**Table S1.** The atomic configuration of the gold particles supported on the Co<sub>3</sub>O<sub>4</sub> catalysts

| Au/Co <sub>3</sub> O <sub>4</sub> catalysts  | Au/Co <sub>3</sub> O <sub>4</sub> -P(111) | Au/Co <sub>3</sub> O <sub>4</sub> -C(001) |
|----------------------------------------------|-------------------------------------------|-------------------------------------------|
| Size of Au particle (nm)                     | 2.56                                      | 2.62                                      |
| Height of Au particle (nm)                   | 2.08                                      | 1.46                                      |
| Layers of Au atoms                           | 9                                         | 7                                         |
| Adhesion energy (J m <sup>-2</sup> )         | 1.02                                      | 1.17                                      |
| Total number of Au atoms                     | 549                                       | 441                                       |
| Number of atoms at corners                   | 24                                        | 24                                        |
| Number of atoms at edges                     | 54                                        | 42                                        |
| Number of atoms on flat surfaces             | 142                                       | 115                                       |
| Number of atoms at the interfacial perimeter | 21                                        | 27                                        |
